# Supplementary material for: Free-standing hybrid films based on graphene and porous carbon particles for flexible supercapacitors
Source: Royal Society of Chemistry journal article supplement (doi:10.1039/c6se00047a), 2017-01-01
Supplement: c6se00047a1.pdf [file c6se00047a1.pdf]

## **Supporting Information**

### **Free-standing hybrid films based on graphene and porous carbon particles for flexible supercapacitors**

**Guillermo A. Ferrero, Marta Sevilla, and Antonio B. Fuentas\***

*Instituto Nacional del Carbón (CSIC), P.O. Box 73, Oviedo 33080, Spain*

\*Corresponding author: [abefu@incar.csic.es](mailto:abefu@incar.csic.es)

#### **Preparation of the carbon nanosheets <sup>1</sup>**

In a typical synthesis procedure, 5 g of potassium citrate (Aldrich) was heat-treated in a stainless steel reactor under nitrogen up to 850 °C) at a heating rate of 3 °C min<sup>-1</sup> and held at this temperature for 1 h. The black solid residue was then washed with HCl (10%). Finally, the solid was collected by filtration, washed with abundant distilled water, and dried at 120 °C for several hours. The carbon samples were denoted as *CK*.

#### **Preparation of the carbon microspheres <sup>2</sup>**

*Synthesis of the hydrochar materials:* Hydrochar materials were prepared by the hydrothermal carbonization of  $\alpha$ -D-Glucose (96 %, Aldrich). Briefly, an aqueous solution of the raw material (0.25 M) was placed in a Teflon-lined stainless-steel autoclave, heated up to 180 °C, and kept at this temperature for 5 h. The resulting carbonaceous solids (hydrochars) were recovered by centrifugation, washed with distilled water, and dried at 120 °C for several hours.

*Synthesis of porous carbon materials:* The hydrochar material was added to a dispersion that contained  $\text{KHCO}_3$  and melamine ( $\text{KHCO}_3/\text{hydrochar}$  weight ratio=6 and melamine/hydrochar weight ratio=2). After the evaporation of the water (under magnetic stirring), the resulting mixture was heat-treated up to 800 °C (heating rate: 5 °Cmin<sup>-1</sup>) under a  $\text{N}_2$  gas flow and held at this temperature for 1 h. The activated carbon thus synthesized was denoted as CS.

**Table S1.** Chemical composition and distribution of the carbon functional groups.

| Functional groups (%)                                         | Sample Code |       |       |
|---------------------------------------------------------------|-------------|-------|-------|
|                                                               | GP          | GP-CK | GP-CS |
| <b>C-C sp<sup>2</sup></b>                                     | 55.6        | 54.6  | 57.9  |
| <b>C-C sp<sup>3</sup></b>                                     | 23.2        | 22.4  | 22.1  |
| <b>C in carbonyl (C=O)</b>                                    | 8.3         | 7.9   | 7.5   |
| <b>C-O</b>                                                    | 8.5         | 8.6   | 7.5   |
| <b>O-C=O</b>                                                  | 2.9         | 4.1   | 3.4   |
| <b><math>\pi</math>-<math>\pi^*</math> shake-up satellite</b> | 1.5         | 2.4   | 1.6   |

**Table S2.** Comparison of the cell areal capacitance for supercapacitors based on graphene films and hybrid graphene films reported in the literature (two-electrode cell system).

| Material                                         | Electrolyte                        | Areal cell capacitance (mF cm <sup>-2</sup> ) |                                 | Reference |
|--------------------------------------------------|------------------------------------|-----------------------------------------------|---------------------------------|-----------|
|                                                  |                                    | Low discharge rates                           | High discharge rates            |           |
| GP                                               | 1 M H <sub>2</sub> SO <sub>4</sub> | 103 (0.23 mA cm <sup>-2</sup> )               | 70 (1190 mA cm <sup>-2</sup> )  | This work |
| GP-CK                                            | 1 M H <sub>2</sub> SO <sub>4</sub> | 136.2 (0.23 mA cm <sup>-2</sup> )             | 80 (1380 mA cm <sup>-2</sup> )  | This work |
| GP-CS                                            | 1 M H <sub>2</sub> SO <sub>4</sub> | 160 (0.29 mA cm <sup>-2</sup> )               | 103 (1242 mA cm <sup>-2</sup> ) |           |
| Graphene-cellulose paper                         | 1 M H <sub>2</sub> SO <sub>4</sub> | 41                                            | 23                              | 3         |
| Graphene gel                                     | 1 M H <sub>2</sub> SO <sub>4</sub> | 33.8 (1 mA cm <sup>-2</sup> )                 | 26.4 (100 mA cm <sup>-2</sup> ) | 4         |
| Solvated Graphene Film                           | 1 M H <sub>2</sub> SO <sub>4</sub> | 48 (0.045 mA cm <sup>-2</sup> )               | 35 (486 mA cm <sup>-2</sup> )   | 5         |
| Holey Graphene Paper                             | 1 M H <sub>2</sub> SO <sub>4</sub> | 104.5 (1 mA cm <sup>-2</sup> )                | 78.5 (20 mA cm <sup>-2</sup> )  | 6         |
| Graphene Hydrogel Films                          | 1 M H <sub>2</sub> SO <sub>4</sub> | 190 (2 mA cm <sup>-2</sup> )                  | 152 (20 mA cm <sup>-2</sup> )   | 7         |
| Hierarchical Porous Graphene Films               | 1 M H <sub>2</sub> SO <sub>4</sub> | 71 (1 mA cm <sup>-2</sup> )                   | 54.7 (100 mA cm <sup>-2</sup> ) | 8         |
| Chemically converted graphene hydrogel films     | 1 M H <sub>2</sub> SO <sub>4</sub> | 95 (0.1 mA cm <sup>-2</sup> )                 | 50 (200 mA cm <sup>-2</sup> )   | 9         |
| Crumpled Graphene Papers                         | 1 M H <sub>2</sub> SO <sub>4</sub> | 81                                            | 58 (57.6 mA cm <sup>-2</sup> )  | 10        |
| Functionalized Graphene Hydrogel Film            | 1 M H <sub>2</sub> SO <sub>4</sub> | 225                                           | 175 (20 mA cm <sup>-2</sup> )   | 11        |
| RGO-PPy membrane Graphene/                       | 2 M KCL                            | 175 (1 mV s <sup>-1</sup> )                   | 125 (400 mV s <sup>-1</sup> )   | 12        |
| Polyaniline/Graphene Nanocomposite Paper         | 1 M H <sub>2</sub> SO <sub>4</sub> | 290 (1 mA cm <sup>-2</sup> )                  | 187 (10 mA cm <sup>-2</sup> )   | 13        |
| Flexible graphene paper pillared by carbon black | 6 M KOH                            | 19.3 (10 mV s <sup>-1</sup> )                 | 11.4 (500 mV s <sup>-1</sup> )  | 14        |
| Graphene-CMK-5                                   | 6 M KOH                            | 178.5 (0.6 mA cm <sup>-2</sup> )              | -                               | 15        |
| Multifunctional aerogel                          | 6 M KOH                            | 77.5 (0.2 mA cm <sup>-2</sup> )               | 38.8 (70 mA cm <sup>-2</sup> )  | 16        |

**Table S3.** Comparison of the cell areal capacitance for solid-state supercapacitors assembled with graphene films and hybrid graphene films reported in the literature.

| Material                                                                       | Electrolyte                         | Areal cell capacitance (mF cm <sup>-2</sup> ) |                                 | Reference |
|--------------------------------------------------------------------------------|-------------------------------------|-----------------------------------------------|---------------------------------|-----------|
|                                                                                |                                     | Low discharge rates                           | High discharge rates            |           |
| <b>GP</b>                                                                      | H <sub>2</sub> SO <sub>4</sub> -PVA | 108.1 (0.26 mA cm <sup>-2</sup> )             | 91 (52.2 mA cm <sup>-2</sup> )  | This work |
| <b>GP-CS</b>                                                                   | H <sub>2</sub> SO <sub>4</sub> -PVA | 165 (0.52 mA cm <sup>-2</sup> )               | 96 (51.7 mA cm <sup>-2</sup> )  | This work |
| <b>Graphene-cellulose paper</b>                                                | H <sub>2</sub> SO <sub>4</sub> -PVA | 46 (2 mV s <sup>-1</sup> )                    | -                               | 3         |
| <b>Holey Graphene Paper</b>                                                    | H <sub>2</sub> SO <sub>4</sub> -PVA | 100.5 (1 mA cm <sup>-2</sup> )                | 70 (20 mA cm <sup>-2</sup> )    | 6         |
| <b>Graphene Hydrogel Films</b>                                                 | H <sub>2</sub> SO <sub>4</sub> -PVA | 372 (2 mA cm <sup>-2</sup> )                  | 260 (40 mA cm <sup>-2</sup> )   | 7         |
| <b>Functionalized Graphene Hydrogel Film</b>                                   | H <sub>2</sub> SO <sub>4</sub> -PVA | 206 (1 mA cm <sup>-2</sup> )                  | 152 (20 mA cm <sup>-2</sup> )   | 11        |
| <b>Graphene/ Polyaniline/Graphene Nanocomposite Paper</b>                      | H <sub>2</sub> SO <sub>4</sub> -PVA | 121 (0.2 mA cm <sup>-2</sup> )                | 75 (10 mA cm <sup>-2</sup> )    | 13        |
| <b>Graphene nanosheets incorporated hierarchical porous carbon</b>             | H <sub>2</sub> SO <sub>4</sub> -PVA | 76.1 (10 mA cm <sup>-2</sup> )                | 30 (30 mA cm <sup>-2</sup> )    | 17        |
| <b>Electrochemically exfoliated Graphene and nanoporous activated graphene</b> | H <sub>2</sub> SO <sub>4</sub> -PVA | 89.5 (10 mV s <sup>-1</sup> )                 | 40.4 (1000 mV s <sup>-1</sup> ) | 18        |
| <b>Cellulose nanofiber-graphene</b>                                            | H <sub>2</sub> SO <sub>4</sub> -PVA | 158                                           | -                               | 19        |
| <b>Polypyrrole-coated paper</b>                                                | H <sub>3</sub> PO <sub>4</sub> -PVA | 420 (1 mA cm <sup>-2</sup> )                  | 230 (20 mA cm <sup>-2</sup> )   | 20        |

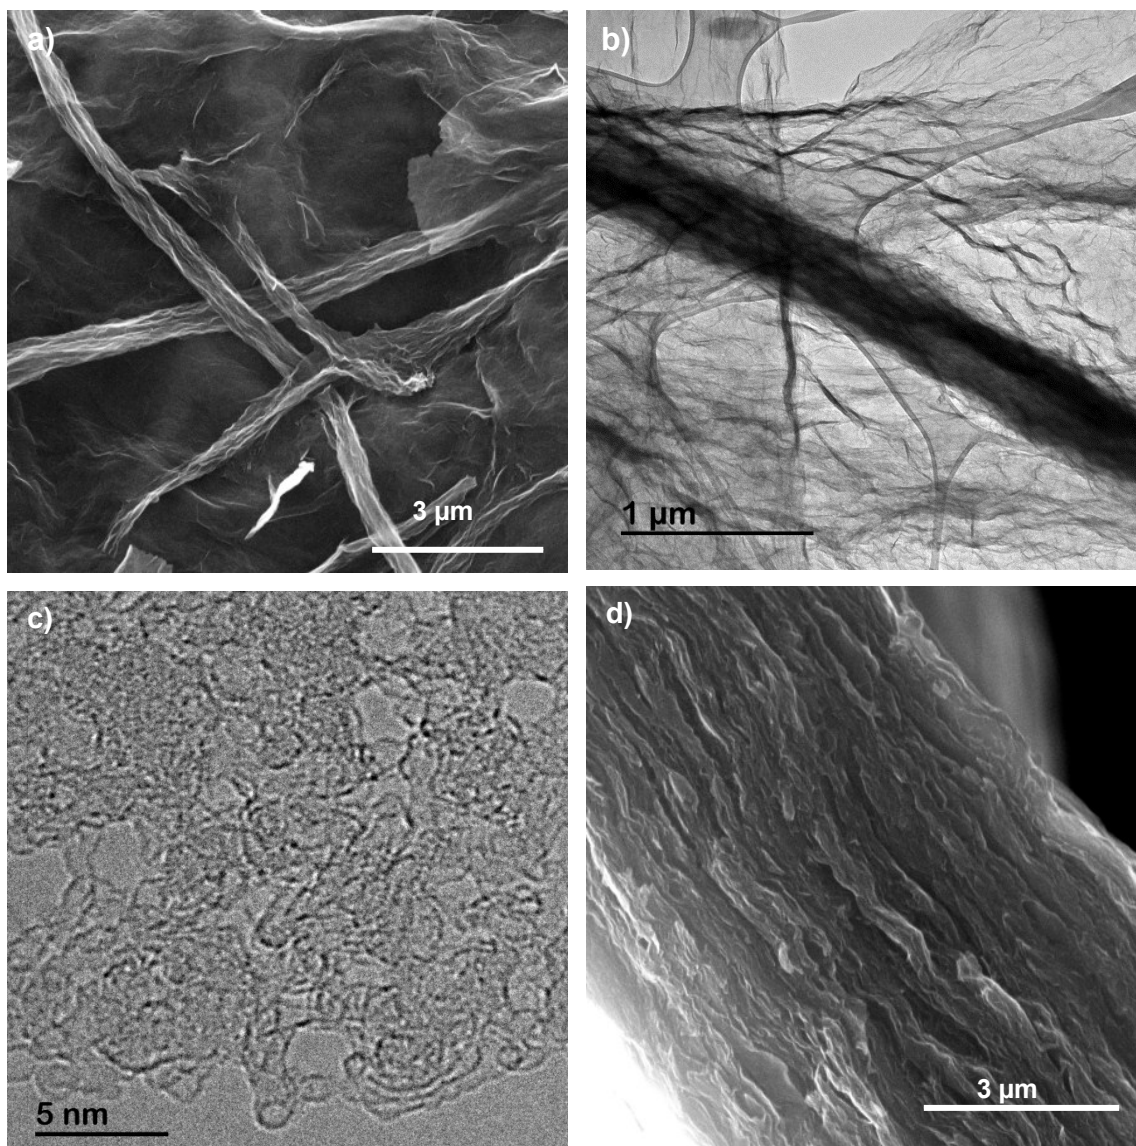

**Figure S1.** (a) SEM and, (b) TEM images of a wrinkled graphene sheet and a graphene nanoscroll, (c) HRTEM image of a graphene sheets showing the in-plane nanopores and (d) a cross-section figure of the GP paper.

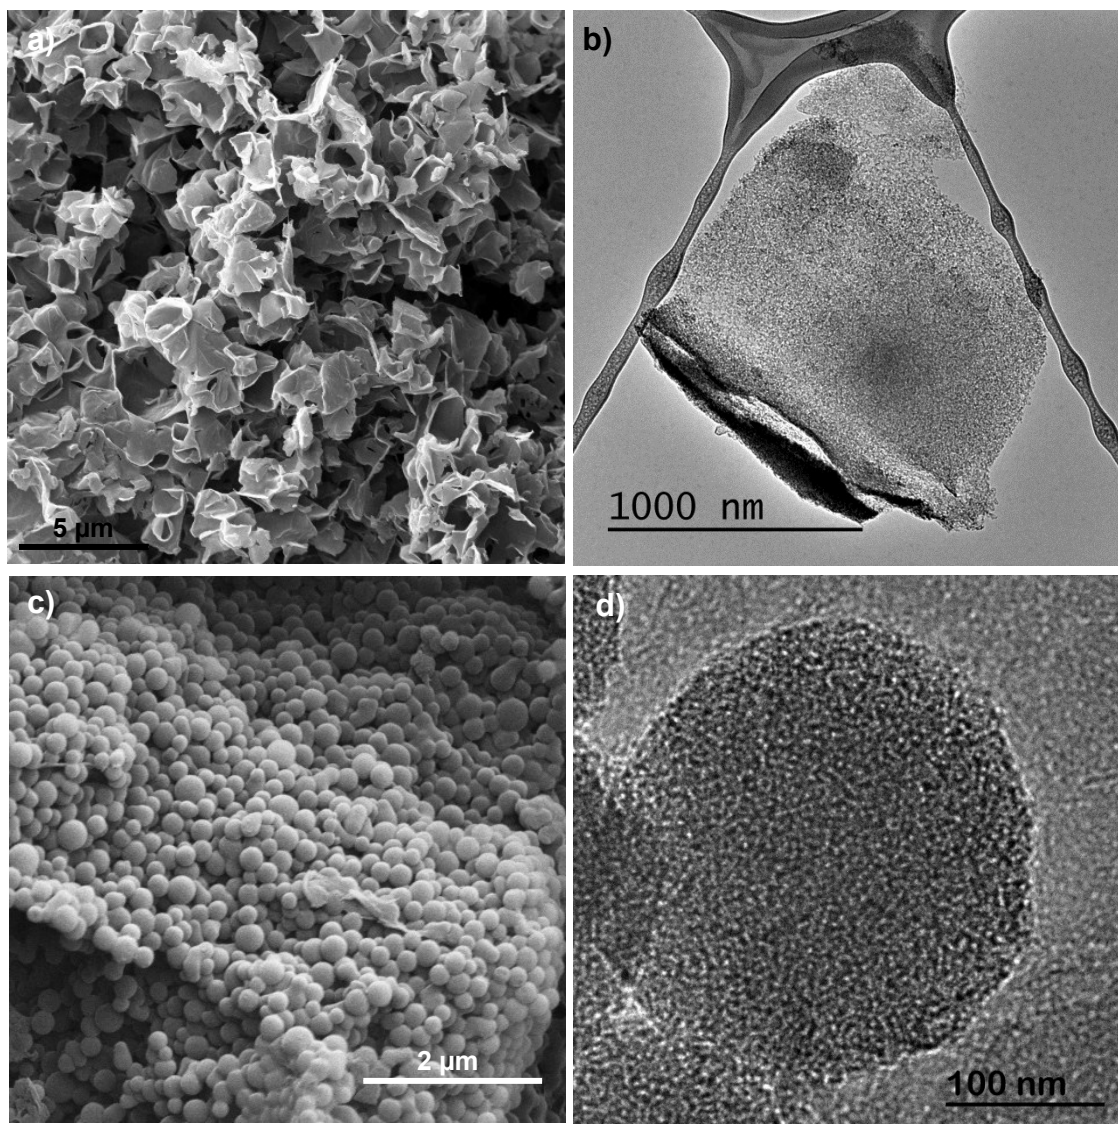

**Figure S2.** SEM and TEM images of CK (a, b) and CS (c, d) carbon particles.

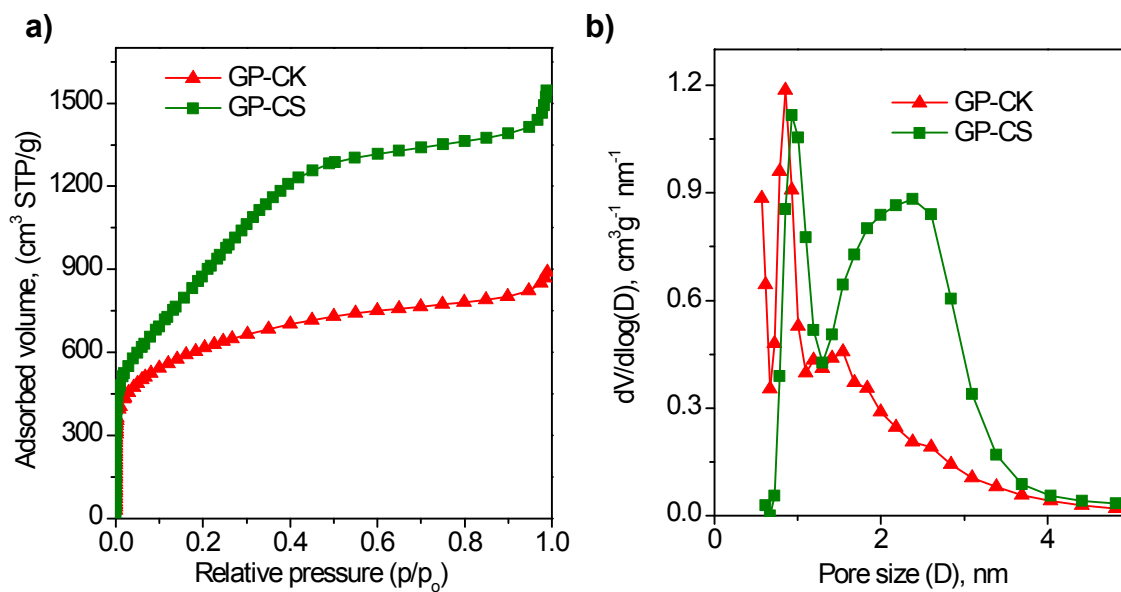

**Figure S3.** (a) Nitrogen sorption isotherms and (b) pore size distributions deduced by means of the QSDFT method for the CK and CS porous carbon samples.

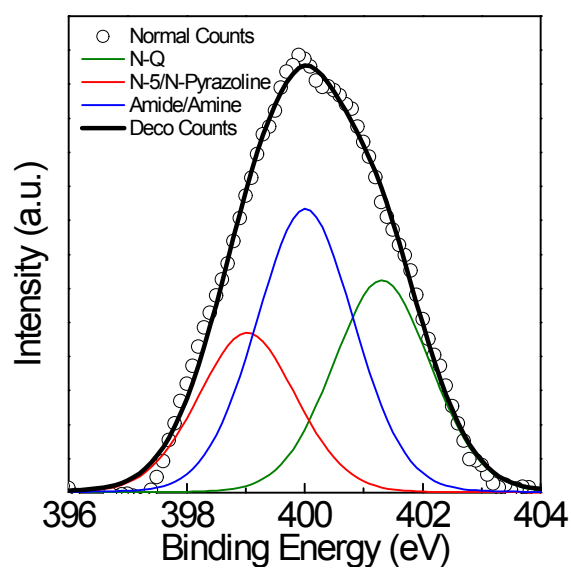

**Figure S4.** High-resolution XPS N1s spectrum of the GP-CS paper.

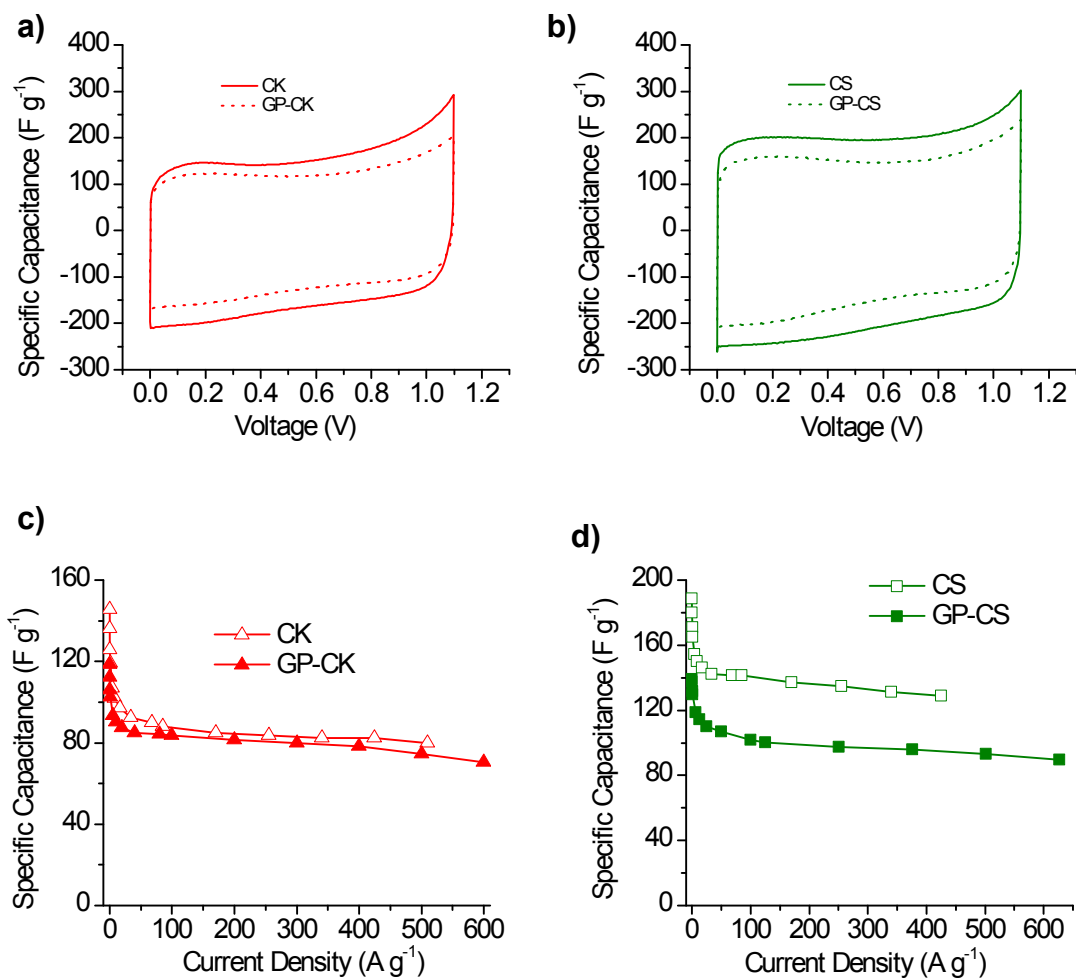

**Figure S5.** Cyclic voltammograms at 5 mV s<sup>-1</sup> for (a) the CK and GP-CK samples and (b) the CS and GP-CS samples, and variation of the electrode gravimetric capacitance with the current density for (c) the CK and GP-CK samples and (d) the CS and GP-CS samples. Electrolyte: 1 M H<sub>2</sub>SO<sub>4</sub>.



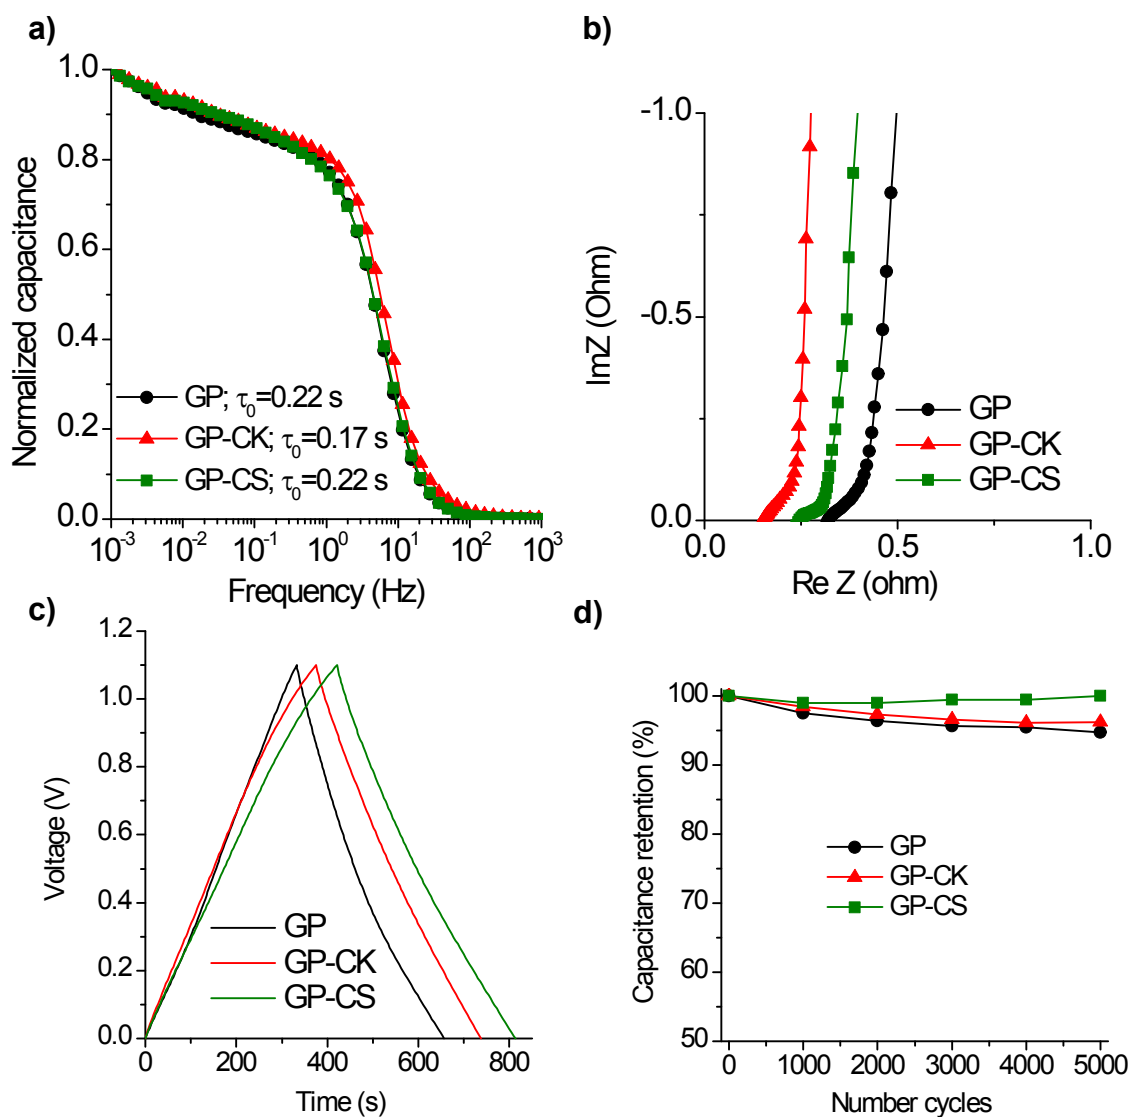

**Figure S6.** (a) Bode plot, (b) Nyquist plot, (c) galvanostatic charge-discharge cycles at  $\sim 0.5 \text{ mA cm}^{-2}$  and (d) long-term cycling stability at  $12 \text{ mA cm}^{-2}$  for the supercapacitors assembled with the GP, GP-CK and GP-CS papers. Electrolyte:  $1 \text{ M H}_2\text{SO}_4$ .

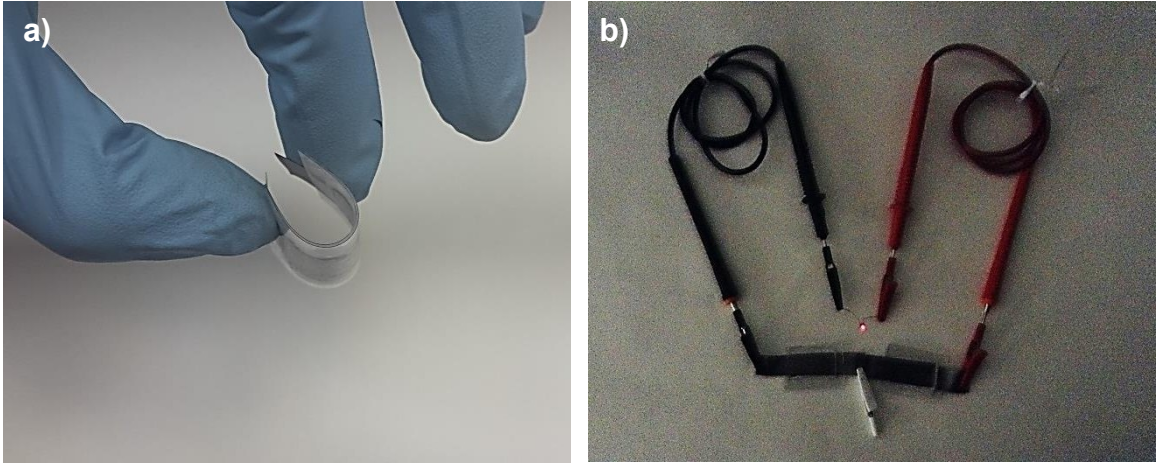

**Figure S7.** (a) Image of the solid-state supercapacitor device and (b) a red LED lit by two flexible supercapacitors connected in series. Electrode material GP-CS.

## References

1. M. Sevilla and A. B. Fuertes, *ACS Nano*, 2014, **8**, 5069-5078.
2. M. Sevilla and A. B. Fuertes, *ChemSusChem*, 2016, **9**, 1880-1888.
3. Z. Weng, Y. Su, D.-W. Wang, F. Li, J. Du and H.-M. Cheng, *Adv. Energy Mater.*, 2011, **1**, 917-922.
4. U. N. Maiti, J. Lim, K. E. Lee, W. J. Lee and S. O. Kim, *Adv. Mater.*, 2014, **26**, 615-619.
5. X. Yang, J. Zhu, L. Qiu and D. Li, *Adv. Mater.*, 2011, **23**, 2833-2838.
6. Y. Xu, C.-Y. Chen, Z. Zhao, Z. Lin, C. Lee, X. Xu, C. Wang, Y. Huang, M. I. Shakir and X. Duan, *Nano Letters*, 2015, **15**, 4605-4610.
7. Y. Xu, Z. Lin, X. Huang, Y. Liu, Y. Huang and X. Duan, *ACS Nano*, 2013, **7**, 4042-4049.
8. Z. Xiong, C. Liao, W. Han and X. Wang, *Adv. Mater.*, 2015, **27**, 4469-4475.
9. X. Yang, C. Cheng, Y. Wang, L. Qiu and D. Li, *Science*, 2013, **341**, 534-537.
10. J. Zang, C. Cao, Y. Feng, J. Liu and X. Zhao, *Sci. Rep.*, 2014, **4**, 6492.
11. Y. Xu, Z. Lin, X. Huang, Y. Wang, Y. Huang and X. Duan, *Adv. Mater.*, 2013, **25**, 5779-5784.
12. J. Zhang, P. Chen, B. H. L. Oh and M. B. Chan-Park, *Nanoscale*, 2013, **5**, 9860-9866.
13. F. Xiao, S. Yang, Z. Zhang, H. Liu, J. Xiao, L. Wan, J. Luo, S. Wang and Y. Liu, *Sci. Rep.*, 2015, **5**, 9359.
14. G. Wang, X. Sun, F. Lu, H. Sun, M. Yu, W. Jiang, C. Liu and J. Lian, *Small*, 2012, **8**, 452-459.
15. Z. Lei, Z. Liu, H. Wang, X. Sun, L. Lu and X. S. Zhao, *J. Mater. Chem. A*, 2013, **1**, 2313-2321.
16. J. Zhu, X. Yang, Z. Fu, J. He, C. Wang, W. Wu and L. Zhang, *Chemistry – A European Journal*, 2016, **22**, 2515-2524.
17. Z. Zhu, H. Jiang, S. Guo, Q. Cheng, Y. Hu and C. Li, *Sci. Rep.*, 2015, **5**, 15936.
18. Z.-S. Wu, S. Yang, L. Zhang, J. B. Wagner, X. Feng and K. Müllen, *Energy Storage Materials*, 2015, **1**, 119-126.
19. K. Gao, Z. Shao, J. Li, X. Wang, X. Peng, W. Wang and F. Wang, *J. Mater. Chem. A*, 2013, **1**, 63-67.
20. L. Yuan, B. Yao, B. Hu, K. Huo, W. Chen and J. Zhou, *Energy Environ. Sci.*, 2013, **6**, 470-476.
